# Supplementary material for: DNA-friendly Cu(ii)/TEMPO-catalyzed 5-hydroxymethylcytosine-specific oxidation
Source: Royal Society of Chemistry journal article supplement (doi:10.1039/c7cc02814h), 2017-01-01

## Supporting Information

### DNA-friendly Cu(II)/TEMPO-catalyzed 5-hydroxymethylcytosine-specific oxidation

Taku Matsushita, Yuya Moriyama, Genta Nagae, Hiroyuki Aburatani and Akimitsu Okamoto\*

#### Contents

#### Experimental.

**Table S1.** Detection of cytosine derivatives in the Infinium microarray after chemical conversions.

**Figure S1.** Cu(II)/TEMPO oxidation of d5hmC.

**Figure S2.** HPLC analysis before/after the reaction for nucleosides, d5mC, dC, dT, dA and dG.

**Figure S3.** Effective oxidation of d5hmC to d5fC in the presence of bipyridine

**Figure S4.** Piperidine cleavage at the oxidized 5hmC site after treatment of single-stranded / double stranded DNA1(5hmC) with the mixture of copper(II) perchlorate and TEMPO.

**Figure S5.** Catalytic mechanism for copper ion-catalyzed oxidation of 5hmC and its transition state.

**Figure S6.** The sigmoid curves observed in the quantitative PCR for the DNA treated with Cu(II)/TEMPO oxidation overlapped that given from intact DNA.

**Figure S7.** Degradation of DNA1(5hmC) with potassium perruthenate.

**Figure S8.** An example of the 5mC, 5hmC, and total cytosine modification (5mC + 5hmC) profiles.

**Scheme S1.** Possible strand-end degradation with potassium perruthenate.

## Experimental

**Copper-catalyzed 5hmC oxidation, piperidine cleavage and PAGE analysis.** A solution of DNA in water (100  $\mu$ M, 2  $\mu$ L) was added to a mixture of each solution of copper(II) perchlorate in water (50 mM, 10  $\mu$ L), TEMPO in acetonitrile (50 mM, 10  $\mu$ L), bipyridine in acetonitrile (50 mM, 10  $\mu$ L), sodium hydroxide in water (50 mM, 10  $\mu$ L) and water (55  $\mu$ L). The mixture was incubated at 25 °C for 45 h. For the PAGE analysis of the products, the reaction mixture is treated with hot piperidine. After the reaction mixture was desalted through a filter, piperidine (9  $\mu$ L) was added to cleave DNA at the reacted nucleotide. After incubation of the mixture at 90 °C for 2 h, the mixture was concentrated *in vacuo*. The reaction products were analyzed with 20% polyacrylamide gel electrophoresis.

**Biotin labeling and recovery of 5hmC DNA.** A mixture of the solutions of DNA strands with different strand length, DNA2 5'-FAM-GTTGTGAGG5hmCGCTGCCCCCA-3' (100  $\mu$ M, 4  $\mu$ L) and DNA3 5'-FAM-AAAAAAG5mCGAAAAAA-3' (50  $\mu$ M, 6  $\mu$ L), was added into a mixture of each solution of 4,4'-dimethyl-2,2'-bipyridyl in acetonitrile (50 mM, 15  $\mu$ L), copper(II) perchlorate in water (50 mM, 10  $\mu$ L), TEMPO in acetonitrile (50 mM, 10  $\mu$ L), sodium hydroxide in water (50 mM, 10  $\mu$ L), and water (55  $\mu$ L). The mixture was incubated at 50 °C for 24 h. After filtration for desalt, solutions of biotin-AC5-hydrazide in DMSO (100 mM, 3  $\mu$ L) and anisidine in acetonitrile (500 mM, 25  $\mu$ L) were added into the filtrated mixture and the solution was incubated at 25 °C for 55 h. The reaction mixture was passed through a filter. A solution (140  $\mu$ L) of streptavidin-coated magnetic beads (Dynabeads M-280) was added into one solution and stirred at 25 °C for 44 h. The magnetic beads were collected by a magnet. A half amount of collected beads was put into 95% formamide containing 10 mM EDTA (100  $\mu$ L) and heated at 95 °C for 10 min. After the supernatant was collected, the magnet beads as a residue was treated with hot formamide four times. The collected supernatant was dialyzed. The solution was concentrated *in vacuo*. The reaction products were analyzed with 20% polyacrylamide gel electrophoresis (7M urea).

**Bisulfite treatment after oxidation.** To 20  $\mu$ L of target DNA solution (3.85  $\mu$ M), 107  $\mu$ L of 4 M bisulfite solution, 6  $\mu$ L of 10 mM hydroquinone solution, and 7  $\mu$ L of 6N sodium hydroxide were added, heated by thermal cycler. The PCR cycle is as follows: 95 °C for 0.5 min, and then 60 °C for 15 min. The cycle was repeated 20 times. The mixture was purified through Micro Bio-Spin P-6 Gel Columns (BioRad) by centrifuging at 1,000G for 4 min. To the solution, 300  $\mu$ L of ethanol, 5  $\mu$ L of 3 M sodium acetate, and 4  $\mu$ L of Dr. GenTLE Precipitation Carrier (TakaraBio) were added and centrifuged at 12000G for 30 min. Water (10  $\mu$ L) was added to the precipitate after removal the supernatant. The solution was used for sequencing without further purification.

**Quantitative PCR after oxidation.** (1) Cu-catalyzed oxidation. A solution of DNA in water (100  $\mu$ M, 2  $\mu$ L) was added to a mixture of each solution of copper(II) perchlorate in water (50 mM, 10  $\mu$ L), TEMPO in acetonitrile (50 mM, 10  $\mu$ L), bipyridine in acetonitrile (50 mM, 10  $\mu$ L), sodium hydroxide in water

(50 mM, 10  $\mu$ L) and water (55  $\mu$ L). The mixture was incubated at 25 °C for 24 h. (2) Ru-catalyzed oxidation. A solution of DNA in water (100  $\mu$ M, 2  $\mu$ L) was added to a mixture of each solution of potassium perruthenate in water (3 mM, 3  $\mu$ L) and sodium hydroxide in water (50 mM, 97  $\mu$ L). The mixture was incubated at 0 °C for 1 h. (3) Control. A solution of DNA in water (100  $\mu$ M, 2  $\mu$ L) was added to water (100  $\mu$ L). The mixture was incubated at 0 °C for 1 h. (4) qPCR. The mixture was diluted to 1/1000 and added into the PCR mixture containing reverse and forward primers (5'-AGTAGTATTTTTTAAGTTTTGGGGG-3' and 5'-CAAATCCCTTTATAAAAAAAAAACAACAATAACAACAT-3', respectively; 100  $\mu$ M, 2  $\mu$ L), KOD Dash DNA polymerase (TOYOBO, 0.2  $\mu$ L) and 1/1000 SYBR Green I (2  $\mu$ L). The PCR cycle is as follows: 95 °C for 15 sec, 55 °C for 15 sec, 75 °C for 15 sec. The cycle was repeated 50 times. The concentration of the undamaged DNA was calculated from the sigmoid curves given from the fluorescent intensity of DNA-binding SYBR green I and the linear calibration line give from standard DNA concentrations.

**High-resolution microarray.** For conventional BS assay, 1 $\mu$ g of genomic DNA was treated using EZ DNA methylation Kit (Zymo Research). For TAB assay, 1  $\mu$ g of DNA was treated using 5hmC TAB-seq Kit (Wisegene) before BS treatment. The following Infinium step was performed according to Illumina's standard protocol of the Infinium MethylationEPIC BeadChip (Illumina). For each CpG site, the  $\beta$ -value was calculated by using the following equation:  $\frac{\text{the intensity of the methylated allele (M)}}{\text{M} + \alpha \cdot \text{the intensity of the unmethylated allele (U)}}$  ( $\alpha$ : a constant (100)). This  $\beta$ -value, which ranged from 0 (unmethylated) to 1 (fully methylated), reflects the methylation level of the individual CpG site represented by the probe.

**Table S1.** Detection of cytosine derivatives in the Infinium microarray after chemical conversions.<sup>a</sup>

|           | C | 5mC | 5hmC | Detection as $\beta$ values |
|-----------|---|-----|------|-----------------------------|
| BS        | U | M   | M    | 5hmC+5mC                    |
| CuTe-oxBS | U | M   | U    | 5mC                         |
| TAB       | U | U   | M    | 5hmC                        |

<sup>a</sup> U, unmethylated alleles; M, methylated alleles

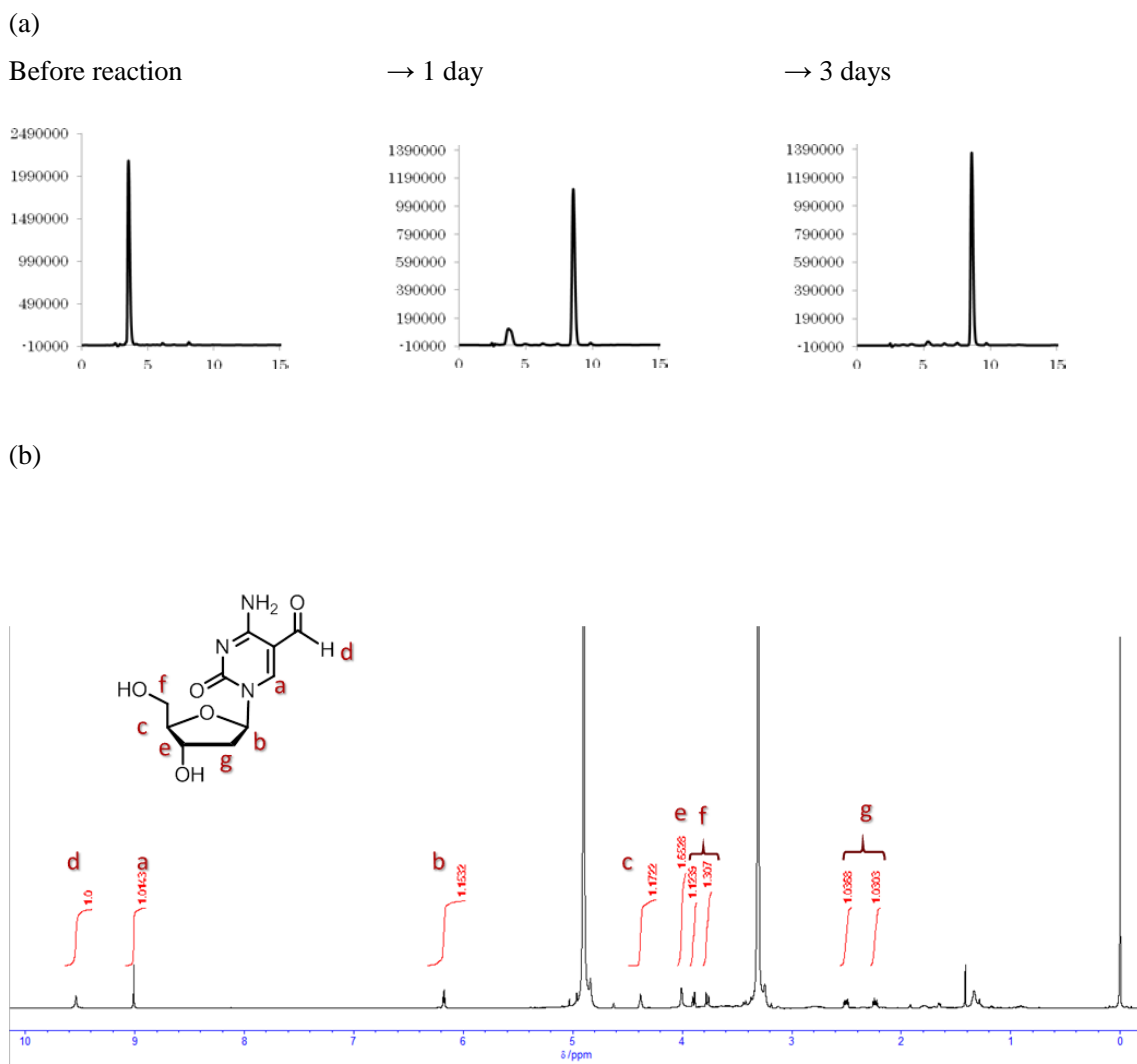

**Figure S1.** Cu(II)/TEMPO oxidation of d5hmC. (a) HPLC analysis before/after the reaction for d5hmC. The X-axis shows the retention time (min). The Y-axis shows the absorption at 254 nm. The nucleotides were analyzed using reverse phase HPLC on a 5-ODS-H column (10 × 150 mm, elution carried out using a solvent mixture of 0.1 M triethylammonium acetate (pH = 7.0), and a linear gradient over 15 min from 2% to 8% acetonitrile). (b)  $^1\text{H}$ -NMR chart (600 MHz, methanol- $d_4$ ) of the reaction product, d5fC.

d5mC

Before reaction

→ 1 day

→ 3 days

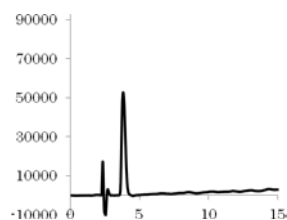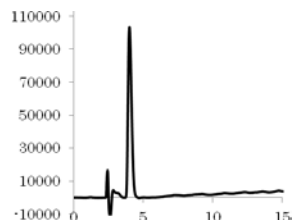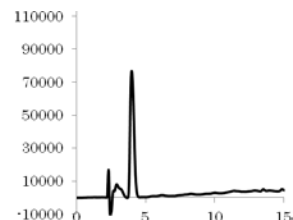

dC

→ 3 days

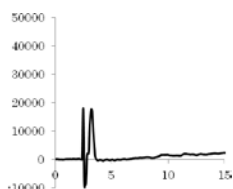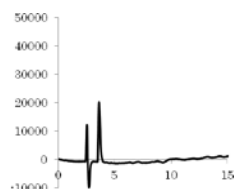

dT

→ 3 days

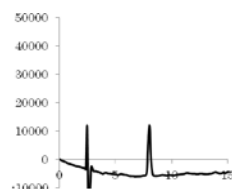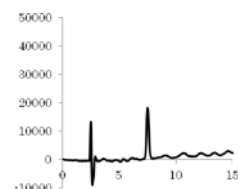

dG

→ 3 days

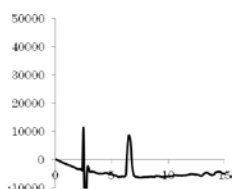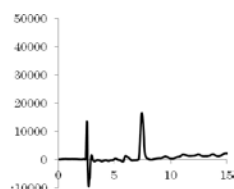

dA

→ 3 days

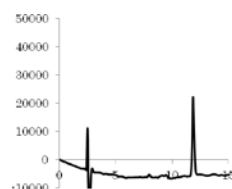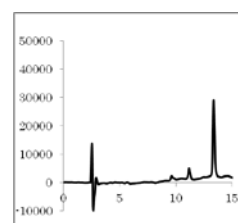

**Figure S2.** HPLC analysis before/after the reaction for nucleosides, d5mC, dC, dT, dA and dG. The X-axis shows the retention time (min). The Y-axis shows the absorption at 254 nm. The nucleotides were analyzed using reverse phase HPLC on a 5-ODS-H column (10 × 150 mm, elution carried out using a solvent mixture of 0.1 M triethylammonium acetate (pH = 7.0), and a linear gradient over 15 min from 2% to 8% acetonitrile).

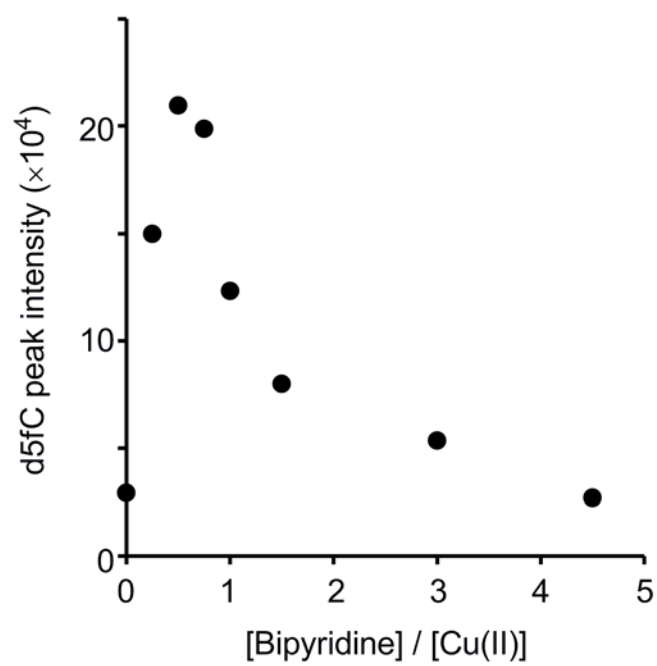

**Figure S3.** Effective oxidation of d5hmC to d5fC in the presence of bipyridine.

DNA1(5hmC): 5'-Fluo-AAAAAAG5hmCGAAAAAA-3'  
complementary DNA1': 3'- TTT TTT C G C TTT TTT-5'

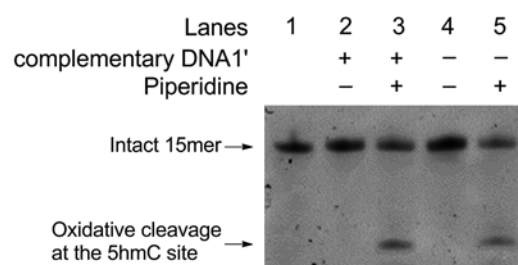

**Figure S4.** Piperidine cleavage at the oxidized 5hmC site after treatment of single-stranded / double stranded DNA1(5hmC) with the mixture of copper(II) perchlorate and TEMPO. Lane 1: Intact DNA1(5hmC). Lanes2-4: The reaction products of DNA1(5hmC) after piperidine treatment.



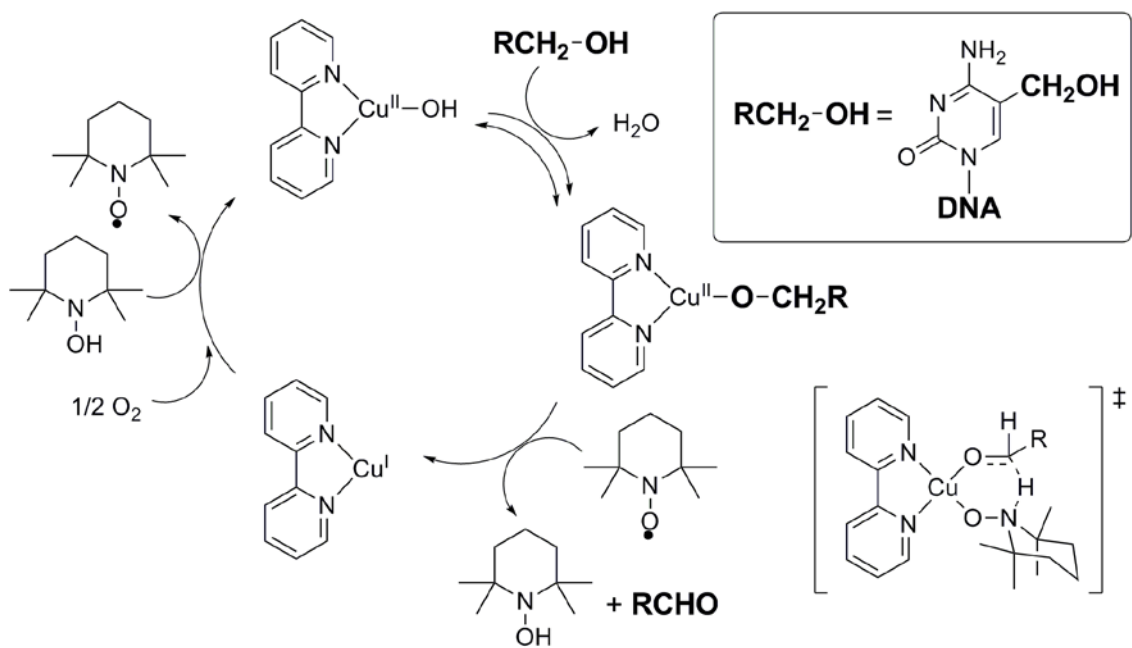

**Figure S5.** Catalytic mechanism for copper ion-catalyzed oxidation of 5hmC and its transition state.

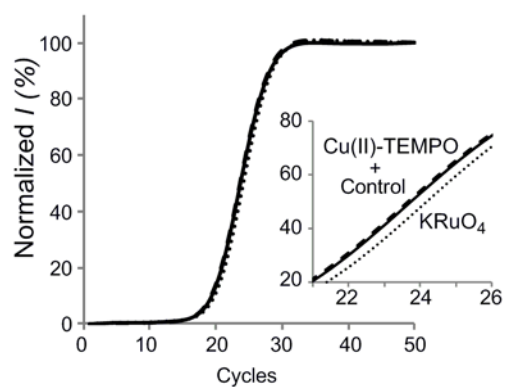

**Figure S6.** The sigmoid curves observed in the quantitative PCR for the DNA treated with Cu(II)/TEMPO oxidation overlapped that given from intact DNA. Solid line, control; dashed line, Cu(II)/TEMPO system; dotted line, potassium perruthenate system. Inset: An expanded figure in the region of PCR cycles 21–26.

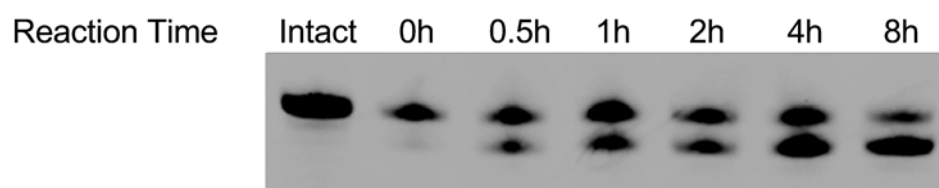

**Figure S7.** Degradation of DNA1(5hmC) with potassium perruthenate. The reaction product after the reaction at 0 °C was filtered for desalting and analyzed by PAGE.

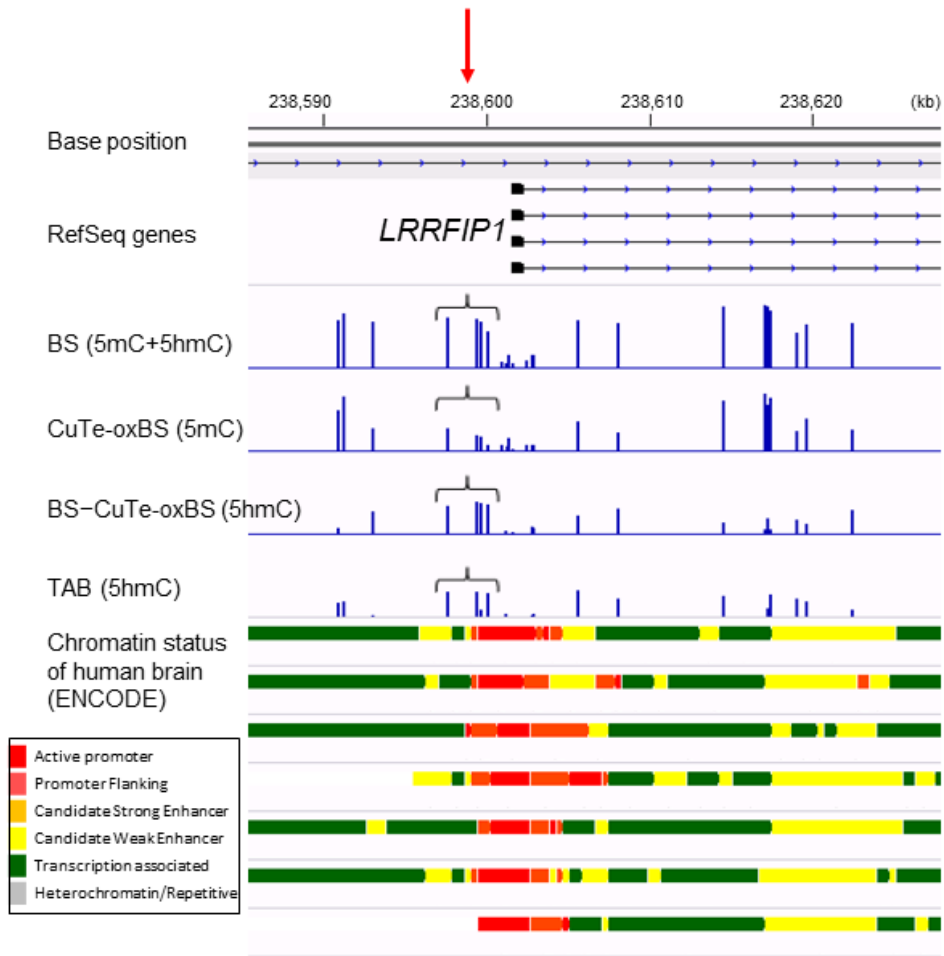

**Figure S8.** An example of the 5mC, 5hmC, and total cytosine modification (5mC + 5hmC) profiles. This is shown for the *LRRFIP1* promoter region (four of five types of transcription products) as a bar chart (Upper part). The red arrow shows the 5hmC-rich region detected in this study. Color bars in the lower part represent seven typical examples of the chromatin statuses of human brains from anatomically different regions around this promoter.

**Scheme S1.** Possible strand-end degradation with potassium perruthenate.

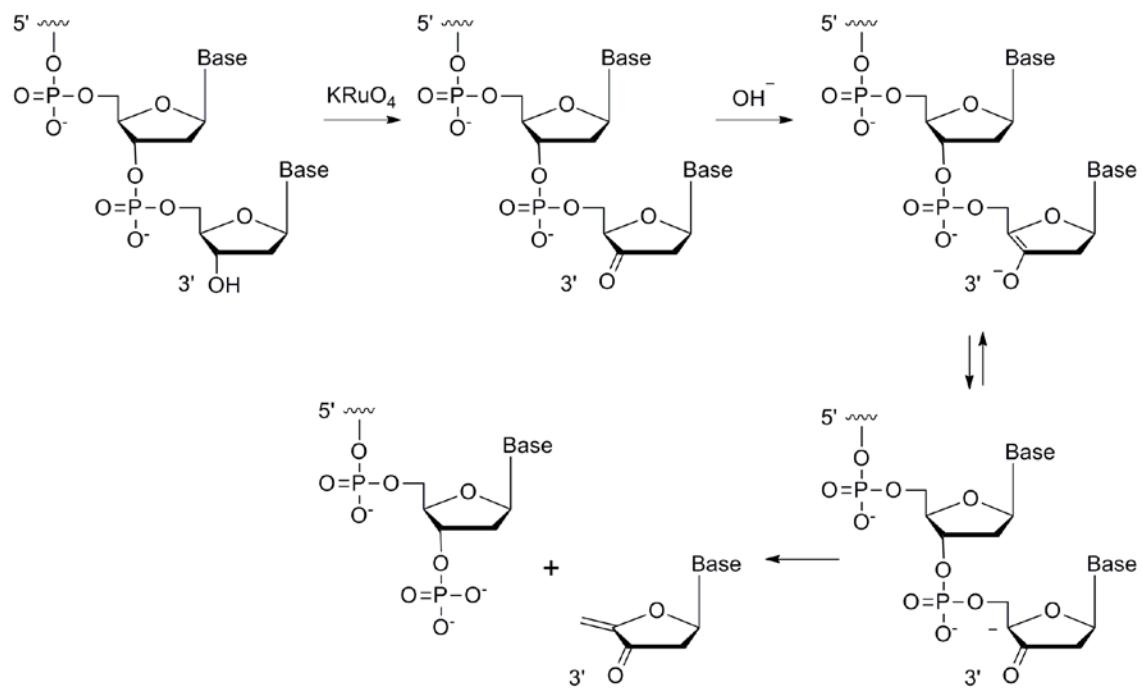

Supplement: c7cc02814h1.pdf [file c7cc02814h1.pdf]
